# Supplementary material
Source: publisher site journal article supplement (https://www.dovepress.com/article/542859)
Supplement: Supplementary file 1 [file 542859_supplementary%20material_3.docx]

**Supplementary Table S1** ARD and NNT among different intervention groups (mITT population, n=110)

| **Group** | **ARD (95% CI)** | **NNT*** |
| --- | --- | --- |
| PHPV vs. Control | 46.1% (26.0%-66.2%) | 2.2 |
| Interferon vs. Control | 25.4% (4.3%-46.4%) | 3.9 |
| PHPV vs. Interferon | 20.7% (-1.1%-42.6%) | 4.8 |

**Notes:** * ARDs are presented with 95%CIs for the primary outcome at 6 months. NNT values are approximate and should be interpreted in conjunction with the 95%CIs of the ARDs.

**Abbreviations:** ARD, absolute risk difference; NNT, number needed to treat; mITT, modified intention to treat; CI, confidence interval.

**Supplementary Table S2** Sensitivity analysis in the ITT population (n=120; missing=not cleared)

| **Index** | **Follow-up** | **PHPV, n/N (%)** | **Interferon, n/N (%)** | **Control, n/N (%)** | **Unadjusted model** | | **Adjusted model** | |
| --- | --- | --- | --- | --- | --- | --- | --- | --- |
| **RR (95% CI)** | ***P*** | **RR (95% CI)** | ***P*** |
| Complete clearance# | 3 months | 21/40 (52.5%) | 14/40 (35%) | 2/40 (5%) | 10.50 (2.63-41.85)a | 0.001a | 10.32 (2.46-43.36)a | 0.001a |
| 7.00 (1.70-28.82)b | 0.007b | 7.55 (1.83-31.19)b | 0.005b |
| 1.50 (0.90-2.51)c | 0.123c | 1.37 (0.82-2.28)c | 0.232c |
| 6 months | 26/40 (65%) | 17/40 (42.5%) | 7/40 (17.5%) | 3.71 (2.45-6.75)a | <0.001a | 3.18 (1.52-6.65)a | 0.002a |
| 2.43 (1.17-5.02)b | 0.015b | 2.40 (1.10-5.24)b | 0.028b |
| 1.53 (1.02-2.29)c | 0.044c | 1.43 (0.92-2.21)c | 0.111c |
| Effective## | 3 months | 29/40 (72.5%) | 21/40 (52.5%) | 8/40 (20%) | 3.63 (1.90-6.93)a | <0.001a | 3.47 (1.84-6.54)a | <0.001a |
| 2.63 (1.32-5.21)b | 0.006b | 2.50 (1.27-4.92)b | 0.008b |
| 1.38 (0.97-1.96)c | 0.072c | 1.39 (0.96-2.01)c | 0.085c |
| 6 months | 32/40 (80%) | 21/40 (52.5%) | 11/40 (27.5%) | 2.91 (1.97-4.30)a | <0.001a | 2.76 (1.64-4.66)a | <0.001a |
| 1.91 (1.10-3.32)b | 0.022b | 1.78 (1.01-3.14)b | 0.047b |
| 1.52 (1.14-2.04)c | 0.009c | 1.50 (1.06-2.14)c | 0.022c |
| HPV E6/E7 mRNA -### | 3 months | 26/40 (65%) | 16/40 (40%) | 5/40 (12.5%) | 5.20 (2.22-12.18)a | <0.001a | 5.10 (2.16-12.07)a | <0.001a |
| 3.20 (1.30-7.90)b | 0.012b | 3.56 (1.48-8.57)b | 0.005b |
| 1.63 (1.04-2.53)c | 0.032c | 1.43 (0.93-2.21)c | 0.101c |
| 6 months | 27/40 (67.5%) | 17/40 (42.5%) | 7/40 (17.5%) | 3.86 (2.16-6.90)a | <0.001a | 3.35 (1.61-6.96)a | 0.001a |
| 2.43 (1.17-5.02)b | 0.015b | 2.40 (1.10-5.24)b | 0.028b |
| 1.59 (1.07-2.35)c | 0.025c | 1.48 (0.96-2.28)c | 0.073c |

**Notes:** # HPV was completely cleared, with all positive HPV subtypes and HPV E6/E7 mRNA turned negative; ## At least one hrHPV subtype or HPV E6/E7 mRNA turned negative; ### HPV E6/E7 mRNA turned negative; a PHPV vs. Control; b Interferon vs. Control; c PHPV vs. Interferon.

Adjusted models were prespecified to include age, residence, contraceptive method, and baseline TCT results.

**Abbreviations:** HPV, human papillomavirus; RR, risk ratio; CI, confidence interval.**Supplementary Table S3** PHPV in improving cervical conditions at 6 months after enrollment (mITT population, n=110)

| **Index** | **PHPV, n/N (%)** | **Interferon, n/N (%)** | **Control, n/N (%)** | **RR (95% CI)** | ***P*** |
| --- | --- | --- | --- | --- | --- |
| **Decreased viral load#** | 32/39 (82.1%) | 26/37 (70.3%) | 15/34 (44.1%) | 1.86 (1.24-2.79)a | 0.001a |
| 1.59 (1.03-2.46)b | 0.026b |
| 1.17 (0.90-1.51)c | 0.227c |
| **Improved cervical appearance##** | 8/39 (20.5%) | 5/37 (13.5%) | 7/34 (20.6%) | 1.00 (0.40-2.46)a | 0.994a |
| 0.66 (0.23-1.87)b | 0.427b |
| 1.52 (0.55-4.22)c | 0.418c |
| **Improved TCT###** | 14/39 (35.9%) | 10/37 (27.0%) | 4/34 (11.8%) | 3.05 (1.11-8.39)a | 0.017a |
| 2.30 (0.79-6.64)b | 0.106b |
| 1.33 (0.68-2.61)c | 0.406c |

**Notes:** # The HPV viral load was etther decreased or undetectable; ## The surface area of cervical erosion showed a reduction; ### The TCT results showed improvement; a PHPV vs Control; b Interferon vs Control; c PHPV vs Interferon;

**Abbreviations:** mITT, modified intention to treat; RR, risk ratio; CI, confidence interval; TCT, ThinPrep® Cytologic Test.

**Supplementary Table S4** Effect of PHPV on vaginal microecology (mITT population)

| **Index** | **Baseline (n=35)** | **3 months after enrollment** | | **6 months after enrollment** | |
| --- | --- | --- | --- | --- | --- |
| **(n=39)** | ***Pa*** | **(n=39)** | ***Pb*** |
| **Microecological, No.** | | | | | |
| Normal | 8 | 21 | **0.007** | 15 | 0.072 |
| Abnormal | 27 | 18 | 24 |
| **Vaginal flora, No.** | | | | | |
| Normal | 20 | 26 | 0.117 | 23 | 0.261 |
| Abnormal | 15 | 13 | 16 |
| **Density, No.** | | | | | |
| ≤3 | 34 | 35 | **0.030** | 38 | 0.135 |
| >3 | 1 | 4 | 1 |
| **Diversity, No.** | | | | | |
| ≥2 | 22 | 29 | 0.099 | 36 | **0.003** |
| <2 | 13 | 10 | 3 |
| **Nugent score, No.** | | | | | |
| ≤3 | 22 | 28 | 0.117 | 26 | 0.236 |
| >3 | 13 | 11 | 13 |
| **PH value, No.** | | | | | |
| <4.6 | 21 | 24 | 0.129 | 15 | 0.010 |
| ≥4.6 | 14 | 15 | 24 |
| **Cleanliness, No.** | | | | | |
| I/II | 20 | 24 | 0.254 | 17 | 0.172 |
| III/IV | 15 | 15 | 22 |
| **H2O2, No.** | | | | | |
| Negative | 11 | 15 | 0.250 | 18 | 0.115 |
| Positive | 24 | 24 | 21 |
| **Sialidase, No.** | | | | | |
| Negative | 32 | 34 | 0.050 | 34 | 0.241 |
| Positive | 3 | 5 | 5 |
| **Leukocyte esterase, No.** | | | | | |
| Negative | 11 | 18 | 0.087 | 7 | 0.069 |
| Positive | 24 | 21 | 32 |
| **β-glucuronidase, No.** | | | | | |
| Negative | 34 | 38 | 0.135 | 38 | 0.135 |
| Positive | 1 | 1 | 1 |
| **Acetylglucosaminidase, No.** | | | | | |
| Negative | 32 | 36 | 0.135 | 37 | 0.115 |
| Positive | 3 | 3 | 2 |

**Notes:** McNemar test was performed. a Baseline vs 3 months after enrollment; b Baseline vs 6 months after enrollment.

**Abbreviations:** mITT, modified intention to treat.

**Supplementary Table S5** PHPV treatment for patients who have failed interferon therapy

| **Case No.** | **Age,y** | **Biopsy** | **Duration** | **HPV type** | | | **HPV E6/E7 mRNA** | | |
| --- | --- | --- | --- | --- | --- | --- | --- | --- | --- |
| **Baseline** | **After Interferon** | **After PHPV** | **Baseline** | **After Interferon** | **After PHPV** |
| 1 | 34 | CIN 1 | 1 year | 58 | 58 | 58 | positive | postive | postive |
| 2 | 30 | CIN 1 | 1+year | 58,66,11 | 58,66 | negative | positive | positive | negative |
| 3 | 33 | Chronic cervicitis | 2 year | 52 | 52 | negative | positive | postive | negative |
| 4 | 35 | CIN 1 | 1+year | 56 | 56 | negative | positive | positive | negative |
| 5 | 36 | CIN 1 | 1 year | 39,52 | 52 | 52 | positive | postive | postive |

**Abbreviations:** HPV, human papillomavirus.

**
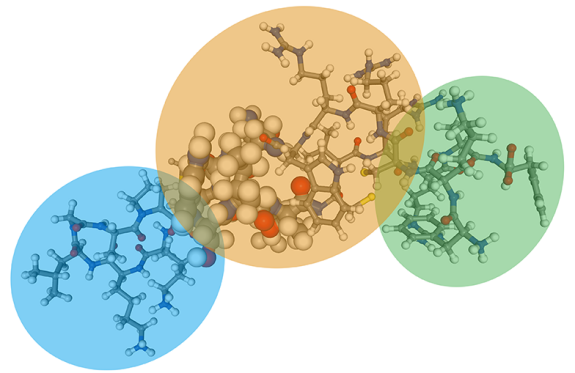
**

**Supplementary Figure S1** Simulated three-dimensional structural pattern diagram of PHPV fusion factor.

Three-dimensional structural pattern diagram of the functional domains of PHPV fusion factor predicted by the Swiss-Model (https://swissmodel.expasy.org/). The blue region represents the transportation domain, the orange region represents the antiviral functional domain, and the green region represents the tissue and cell repair functional domain.


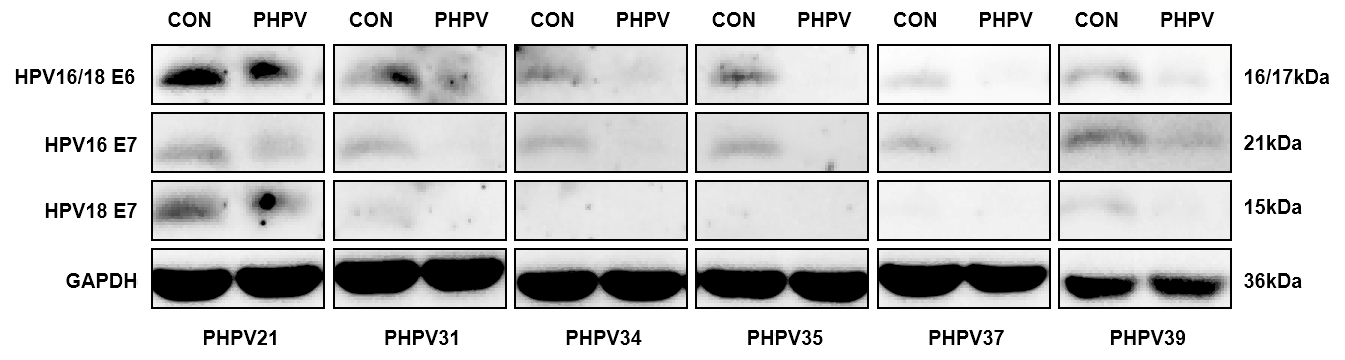


**Supplementary Figure S2** Western blot analysis confirmed reductions in HPV E6/E7 protein expression following PHPV treatment.

Cervical exfoliated cells from participants were collected before and after treatment with PHPV, and the proteins were extracted. The expression levels of HPV E6/E7 proteins were assessed using Western blotting.
